# Supplementary material for: A comparison between dithienosilole and dithienogermole donor–acceptor type co-polymers for organic bulk heterojunction photovoltaic devices
Source: Royal Society of Chemistry journal article supplement (doi:10.1039/c2jm30256j), 2012-01-01

## *.Supplementary Information*

**A comparison between dithienosilole and dithienogermole  
Donor-Acceptor type Copolymers for Organic Bulk Heterojunction  
Photovoltaic Devices**

Jong Soo Kim<sup>a</sup>, Zhuping Fei<sup>b</sup>, David T. James<sup>a</sup>, Martin J. Heeney<sup>\*b</sup>, Ji-Seon Kim<sup>\*a</sup>

*Department of Physics<sup>a</sup> and Department of Chemistry<sup>b</sup>,*

*& Center for Plastic Electronics, Imperial College London, London, SW7 2AZ, UK*

\*\* Corresponding authors: [ji-seon.kim@imperial.ac.uk](mailto:ji-seon.kim@imperial.ac.uk), [m.heeney@imperial.ac.uk](mailto:m.heeney@imperial.ac.uk)

\*\* Jong Soo Kim and Zhuping Fei have contributed equally to this work.

## Experimental

Thin film transistors (TFTs) were fabricated by spin coating of homopolymers from a 1 wt% concentration in dichlorobenzene (DCB) with bottom-gate and bottom-contact configuration using heavily doped n-type Si wafers as the gate electrodes with a silicon dioxide and HMDS (hexamethyldisilazane) layer as the gate dielectric. The gold source and drain electrodes were deposited through a shadow mask.

**Table S1.** Thin film transistor (TFT) mobilities of polymers studied in this work.

|               | Saturation Mobility ( $\text{cm}^2/\text{Vs}$ ) |                     |               |                   |                     |                   |
|---------------|-------------------------------------------------|---------------------|---------------|-------------------|---------------------|-------------------|
|               | As cast                                         |                     |               | After annealing   |                     |                   |
|               | Average<br>(E-06)                               | Std. Dev.<br>(E-06) | Max<br>(E-06) | Average<br>(E-06) | Std. Dev.<br>(E-06) | Max<br>(E-06)     |
| <b>MeGeBT</b> | 16.7                                            | 10.9                | 26.6          | 69.8 <sup>a</sup> | 41.2 <sup>a</sup>   | 97.1 <sup>a</sup> |
| <b>MeSiBT</b> | 7.84                                            | 2.67                | 10.7          | 17.7 <sup>b</sup> | 13.3 <sup>b</sup>   | 39.5 <sup>b</sup> |
| <b>BuGeBT</b> | 9.99                                            | 2.79                | 12.8          | 8.57 <sup>b</sup> | 3.84 <sup>b</sup>   | 15.0 <sup>b</sup> |
| <b>BuSiBT</b> | 2.19                                            | 0.07                | 2.26          | 0.57 <sup>a</sup> | 0.22 <sup>a</sup>   | 0.86 <sup>a</sup> |

Annealing at <sup>a</sup>: 150°C and <sup>b</sup>: 200°C

**Table S2.** Summary of the Polymer:PC70BM blend OPV device performance.

| Donor  | Acceptor | Condition                                                                                        | J <sub>sc</sub> | V <sub>oc</sub> | FF   | PCE  |
|--------|----------|--------------------------------------------------------------------------------------------------|-----------------|-----------------|------|------|
| MeGeBT | PC70BM   | Solvent (CB), Blend ratio (1:3), spin coating (900rpm, 60s), slow drying                         | 6.51            | 0.94            | 0.43 | 2.61 |
|        |          | Solvent (CB), Blend ratio (1:3), spin coating (1000rpm, 90s)                                     | 6.27            | 0.93            | 0.42 | 2.46 |
|        |          | Solvent (CB), Blend ratio (1:3.5), spin coating (900rpm, 60s), slow drying                       | 6.11            | 0.89            | 0.39 | 2.11 |
|        |          | Solvent (CB), Blend ratio (1:3.5), spin coating (1000rpm, 90s)                                   | 6.15            | 0.94            | 0.44 | 2.55 |
|        |          | Solvent (CB), Blend ratio (1:4), spin coating (900rpm, 60s), slow drying                         | 6.20            | 0.91            | 0.37 | 2.08 |
|        |          | Solvent (CB), Blend ratio (1:4), spin coating (1000rpm, 90s)                                     | 7.04            | 0.91            | 0.43 | 2.73 |
|        |          | Solvent (CB), Blend ratio (1:4), spin coating (900rpm, 120s)                                     | 5.51            | 0.91            | 0.47 | 2.37 |
|        |          | Solvent (CB), Blend ratio (1:4), spin coating (1000rpm, 120s)                                    | 4.99            | 0.92            | 0.49 | 2.23 |
|        |          | Solvent (CB), Blend ratio (1:4), spin coating (1200rpm, 120s)                                    | 4.22            | 0.91            | 0.50 | 1.91 |
|        |          | Solvent (CB+OT), Blend ratio (1:3), spin coating (1000rpm, 120s)                                 | 1.17            | 0.55            | 0.33 | 0.22 |
|        |          | Solvent (CB+OT), Blend ratio (1:3.5), spin coating (1000rpm, 120s)                               | 1.89            | 0.62            | 0.36 | 0.42 |
|        |          | Solvent (CB+OT), Blend ratio (1:4), spin coating (1000rpm, 120s)                                 | 1.43            | 0.45            | 0.31 | 0.19 |
|        |          | Solvent (CB+OT), Blend ratio (1:3), spin coating (1000rpm, 120s)_Thermal annealing (TA) at 120°C | 1.2             | 0.43            | 0.31 | 0.16 |
|        |          | Solvent (CB+OT), Blend ratio (1:3.5), spin coating (1000rpm, 120s)_TA 120°C                      | 1.00            | 0.38            | 0.33 | 0.13 |

|      |                                                                            |      |      |      |      |
|------|----------------------------------------------------------------------------|------|------|------|------|
|      | Solvent (DCB), Blend ratio (1:4), spin coating (1000rpm, 120s)             | 6.11 | 0.94 | 0.46 | 2.66 |
|      | Solvent (DCB), Blend ratio (1:4), spin coating (1000rpm, 120s)_TA 150°C    | 4.84 | 0.67 | 0.43 | 1.38 |
|      | Solvent (DCB+OT), Blend ratio (1:4), spin coating (1000rpm, 120s)          | 2.80 | 0.84 | 0.33 | 0.78 |
|      | Solvent (DCB+OT), Blend ratio (1:4), spin coating (1000rpm, 120s)_TA 150°C | 1.75 | 0.59 | 0.29 | 0.30 |
| ICBA | Solvent (CB), Blend ratio (1:4), spin coating (900rpm, 120s)               | 0.59 | 1.06 | 0.24 | 0.15 |
|      | Solvent (CB), Blend ratio (1:4), spin coating (900rpm, 120s)_TA 150°C      | 0.36 | 0.92 | 0.25 | 0.08 |
|      | Solvent (CB), Blend ratio (1:4), spin coating (1000rpm, 90s)               | 0.69 | 1.04 | 0.25 | 0.18 |
|      | Solvent (CB), Blend ratio (1:3), spin coating (1000rpm, 90s)               | 0.66 | 1.09 | 0.24 | 0.17 |
|      | Solvent (CB), Blend ratio (1:3), spin coating (900rpm, 120s)               | 0.51 | 0.85 | 0.26 | 0.11 |
|      | Solvent (CB), Blend ratio (1:3), spin coating (900rpm, 120s)_TA 150°C      | 0.27 | 0.85 | 0.24 | 0.06 |
|      | Solvent (CB), Blend ratio (1:1), spin coating (1100rpm, 90s)               | 0.19 | 1.06 | 0.21 | 0.04 |
|      | Solvent (CB), Blend ratio (1:1), spin coating (1000rpm, 90s)               | 0.16 | 1.05 | 0.22 | 0.04 |
|      | Solvent (CB), Blend ratio (1:1), spin coating (900rpm, 60s), slow drying   | 0.15 | 1.06 | 0.23 | 0.04 |
|      | Solvent (CB), Blend ratio (1:1), spin coating (900rpm, 120s)               | 0.10 | 0.76 | 0.27 | 0.02 |
|      | Solvent (CB), Blend ratio (1:1), spin coating (900rpm, 120s)_TA 150°C      | 0.07 | 0.75 | 0.24 | 0.01 |

|        |        |                                                                             |      |      |      |      |
|--------|--------|-----------------------------------------------------------------------------|------|------|------|------|
| MeSiBT | PC70BM | Solvent (DCB), Blend ratio (1:4), spin coating (900rpm, 120s)               | 4.80 | 0.91 | 0.44 | 1.92 |
|        |        | Solvent (DCB), Blend ratio (1:4), spin coating (1000rpm, 120s)              | 4.57 | 0.89 | 0.43 | 1.75 |
|        |        | Solvent (DCB), Blend ratio (1:4), spin coating (1200rpm, 120s)              | 4.29 | 0.94 | 0.45 | 1.84 |
| BuGeBT | PC70BM | Solvent (DCB), Blend ratio (1:4), spin coating (1000rpm, 120s)              | 3.71 | 0.90 | 0.45 | 1.50 |
| BuSiBT | PC70BM | Solvent (DCB), Blend ratio (1:3), spin coating (900rpm, 60s), slow drying   | 1.98 | 0.52 | 0.32 | 0.33 |
|        |        | Solvent (DCB), Blend ratio (1:3), spin coating (1000rpm, 90s)               | 2.18 | 0.76 | 0.36 | 0.60 |
|        |        | Solvent (DCB), Blend ratio (1:3.5), spin coating (900rpm, 60s), slow drying | 1.53 | 0.75 | 0.36 | 0.41 |
|        |        | Solvent (DCB), Blend ratio (1:3.5), spin coating (1000rpm, 90s)             | 1.72 | 0.83 | 0.35 | 0.50 |
|        |        | Solvent (DCB), Blend ratio (1:4), spin coating (900rpm, 120s)               | 2.03 | 0.81 | 0.36 | 0.59 |
|        |        | Solvent (DCB), Blend ratio (1:4), spin coating (1000rpm, 90s)               | 1.76 | 0.64 | 0.36 | 0.41 |

**Figure S1.** Optimized molecular geometry with calculated bond length and torsion angle for MeGeBT (structure of donor-acceptor-donor (D-A-D) and acceptor-donor-acceptor (A-D-A)), MeSiBT (D-A-D and A-D-A), BuGeBT (D-A-D and A-D-A) and BuSiBT (D-A-D and A-D-A) molecules. Light blue: Si or Ge, S in yellow, N in blue, C in gray and H in white.

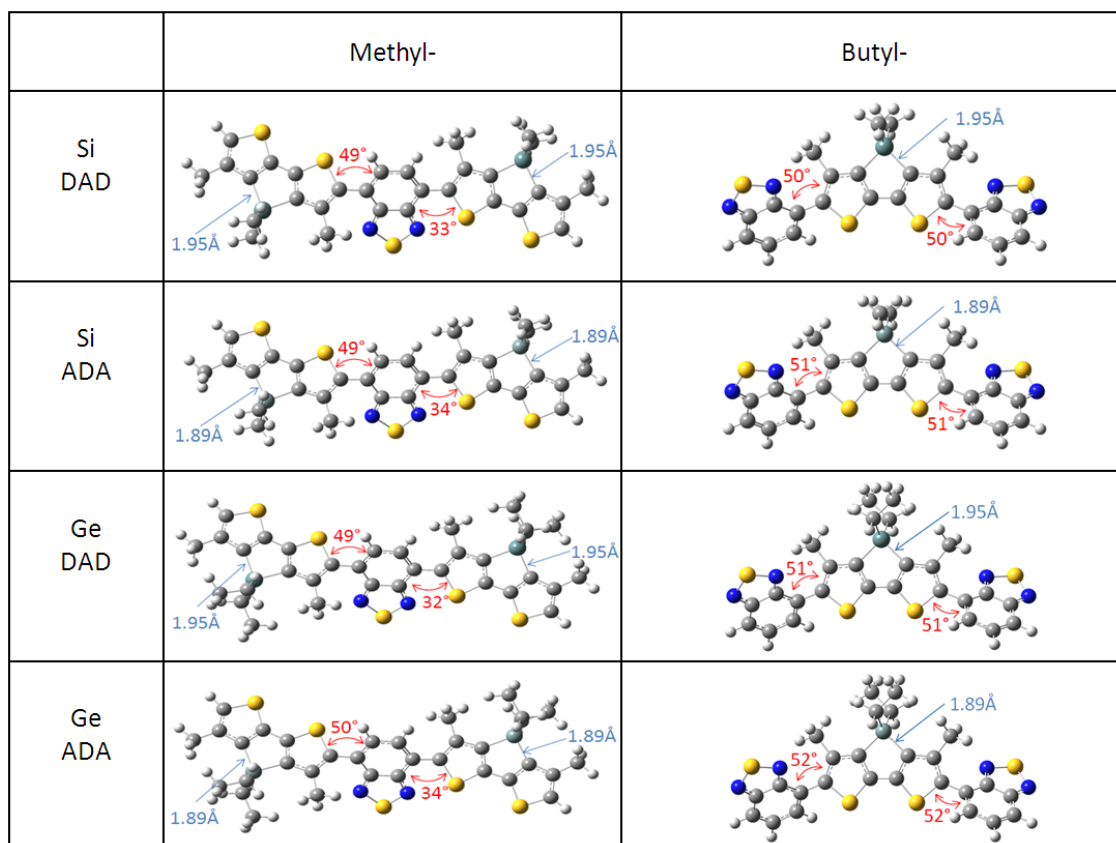

**Figure S2.** X-ray diffraction data of homo polymers (MeGeBT, MeSiBT, BuGeBT and BuSiBT).

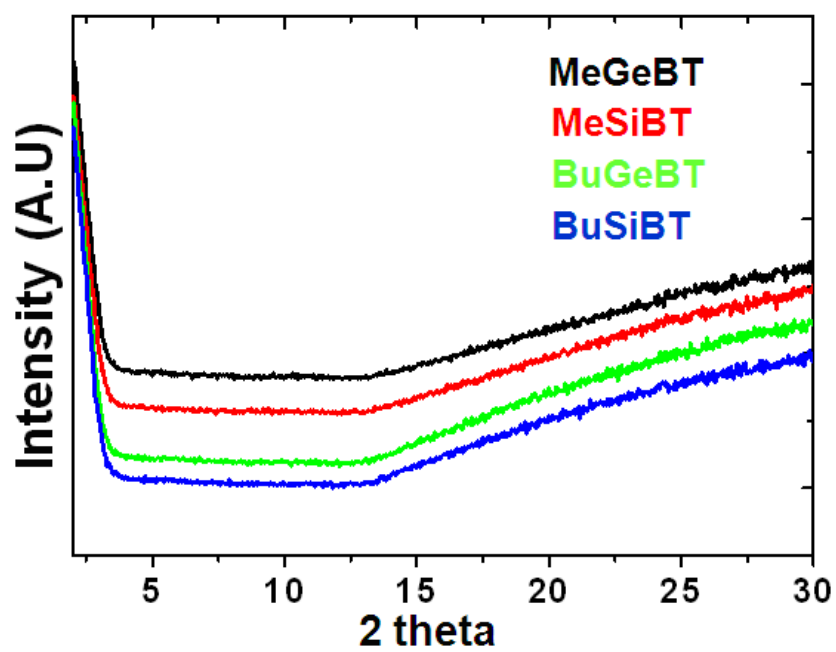

**Figure S3.** Potential energy curves for torsion angle dependency from 0-180 degrees. The lowest single point energy of each curve is set to zero for comparison. MeSiBT and MeGeBT have a similar tendency that means there is no significant difference in backbone stiffness.

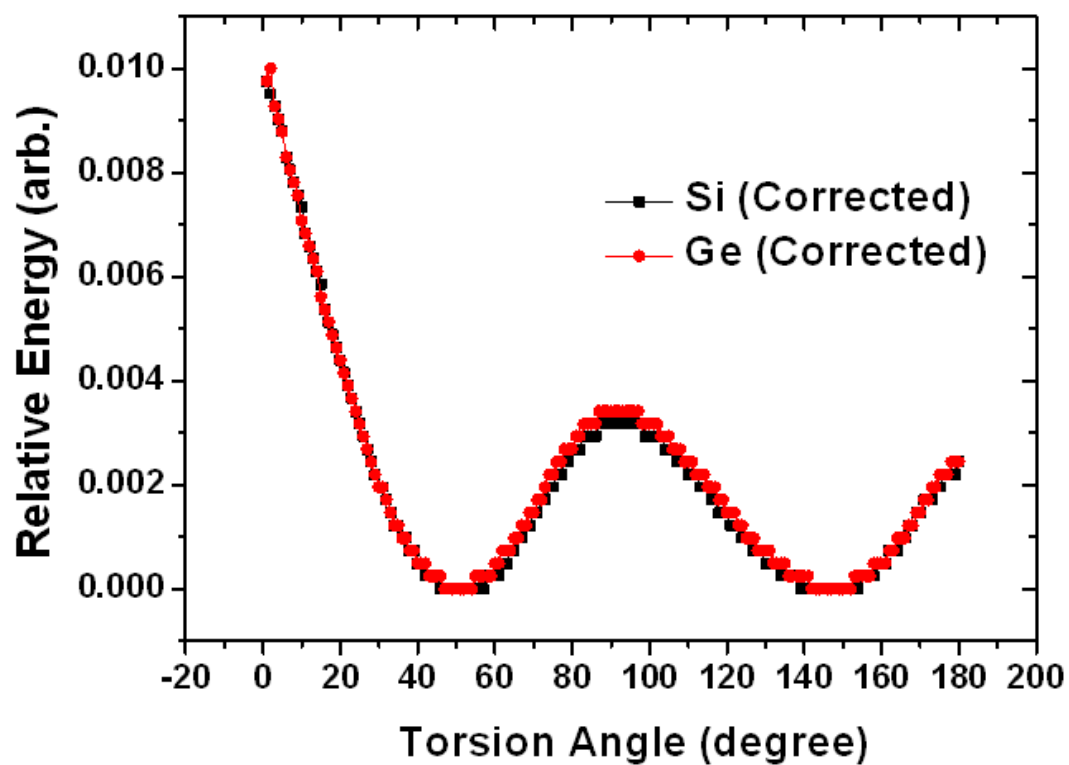



**Figure S4.** HOMO and LUMO energy levels of the MeSiBT (D-A-D and A-D-A) and BuSiBT (D-A-D and A-D-A) molecules calculated using the Gaussian09 package; density functional theory (DFT) at the B3LYP level of theory with a basis set of 6-31G(d).

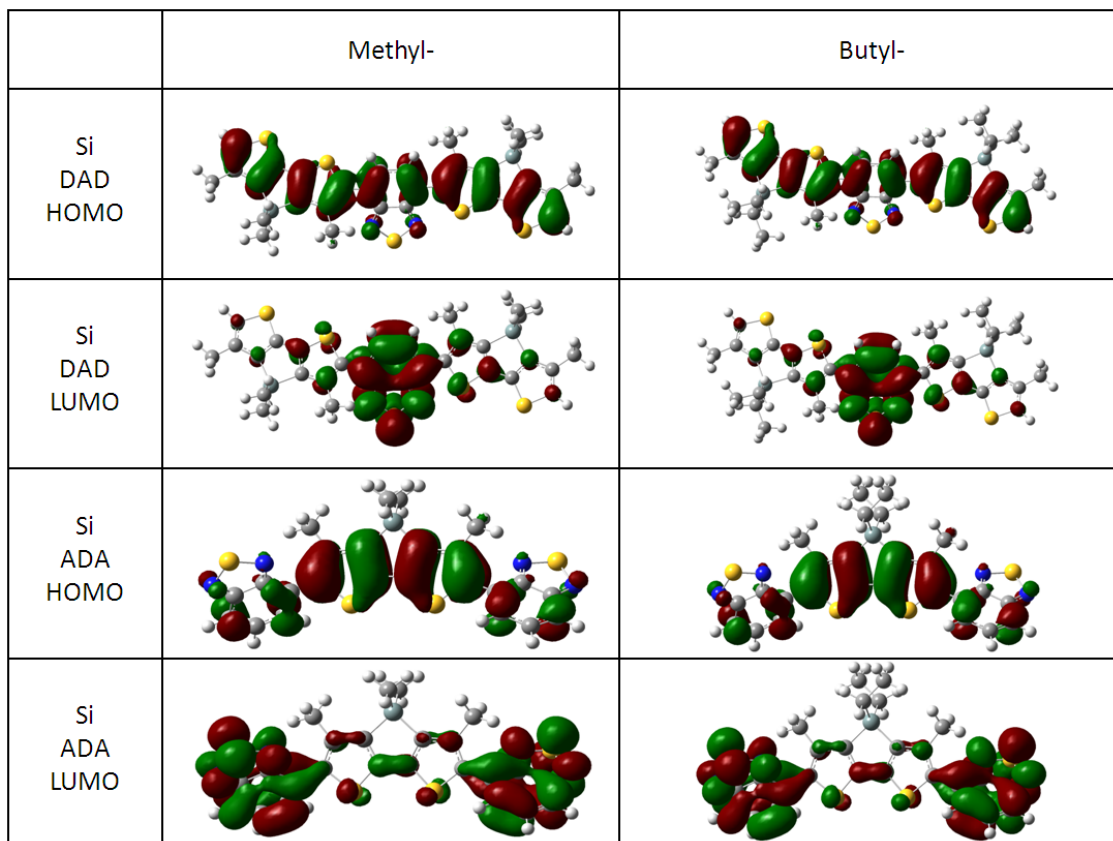

**Figure S5.** HOMO and LUMO energy levels of the MeGeBT (D-A-D and A-D-A) and BuGeBT (D-A-D and A-D-A) molecules calculated using the Gaussian09 package; density functional theory (DFT) at the B3LYP level of theory with a basis set of 6-31G(d).

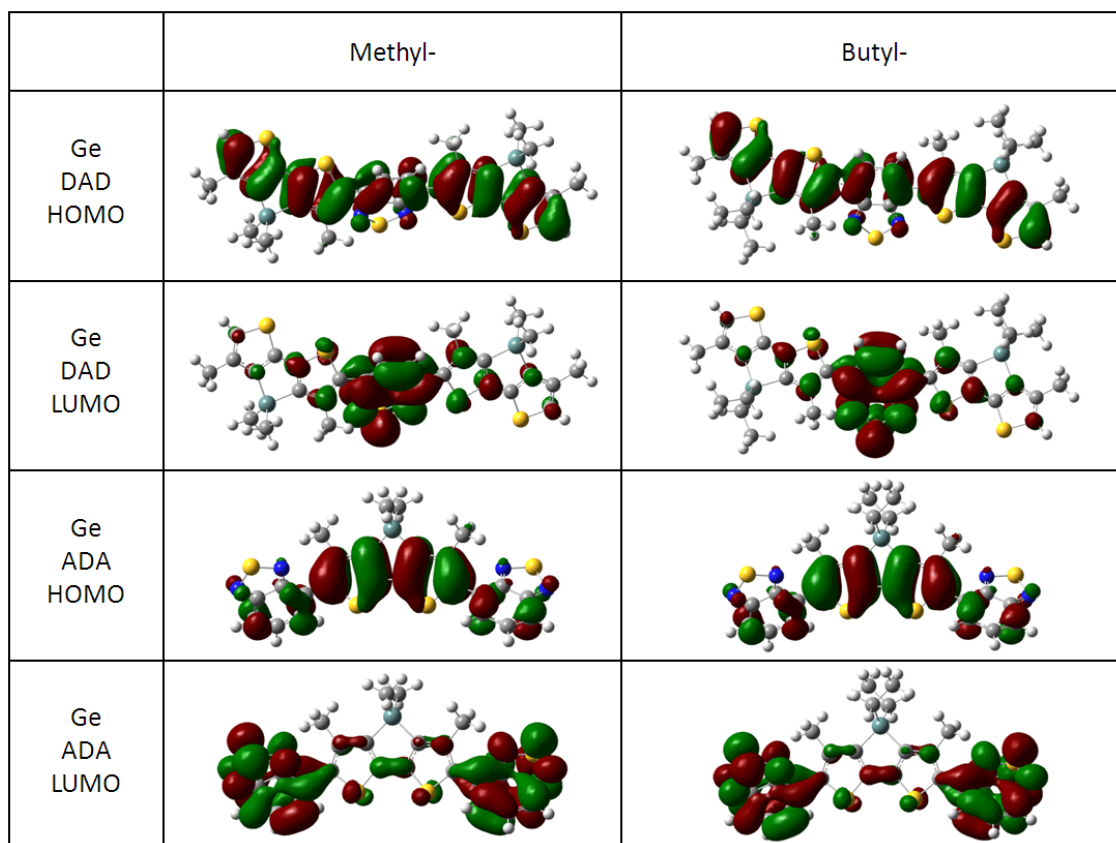

Figure S6.  $^1\text{H}$  NMR spectrum of **BuSiBT** in  $\text{CDCl}_3$ .

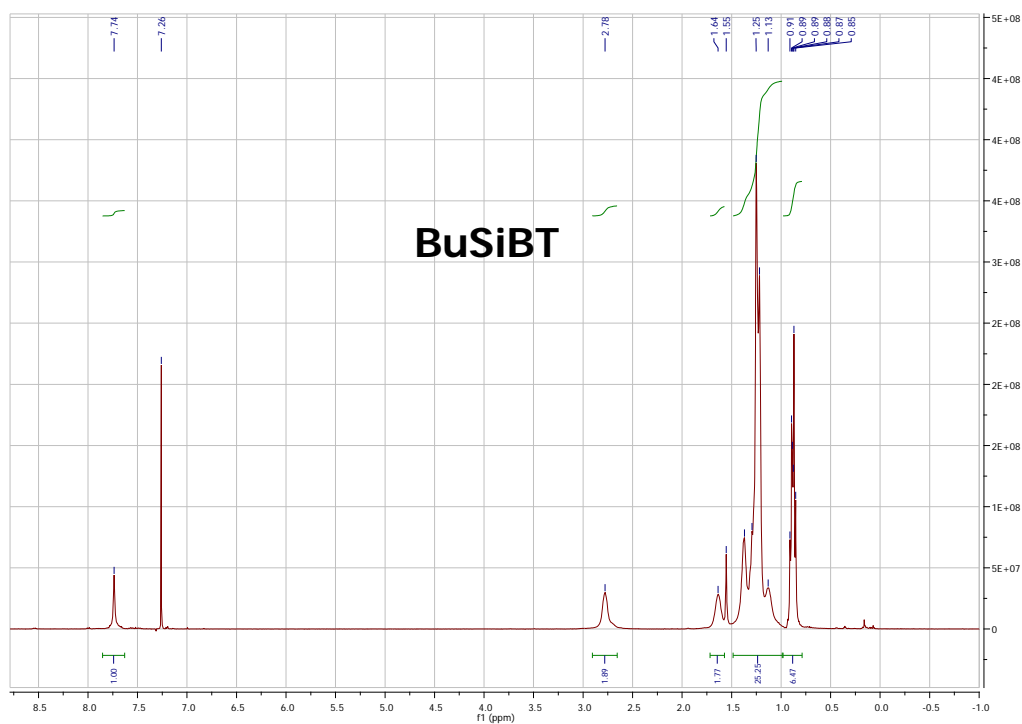

Figure S7.  $^1\text{H}$  NMR spectrum of **BuGeBT** in  $\text{CDCl}_3$ .

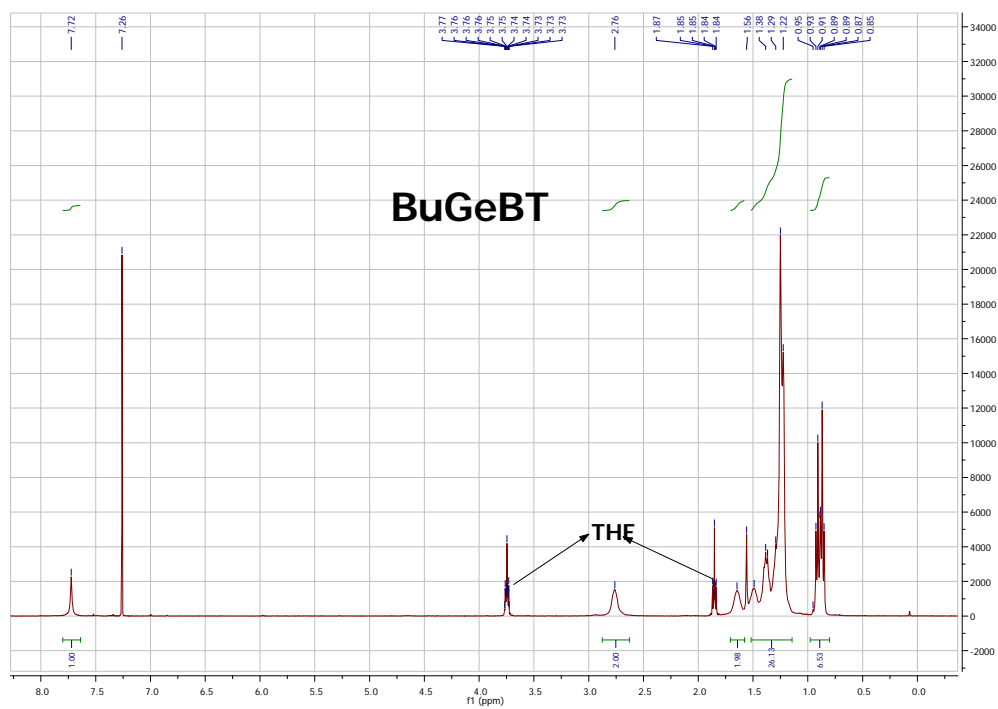

**Figure S8.**  $^1\text{H}$  NMR spectrum of MeGeBT in  $\text{CDCl}_3$ .

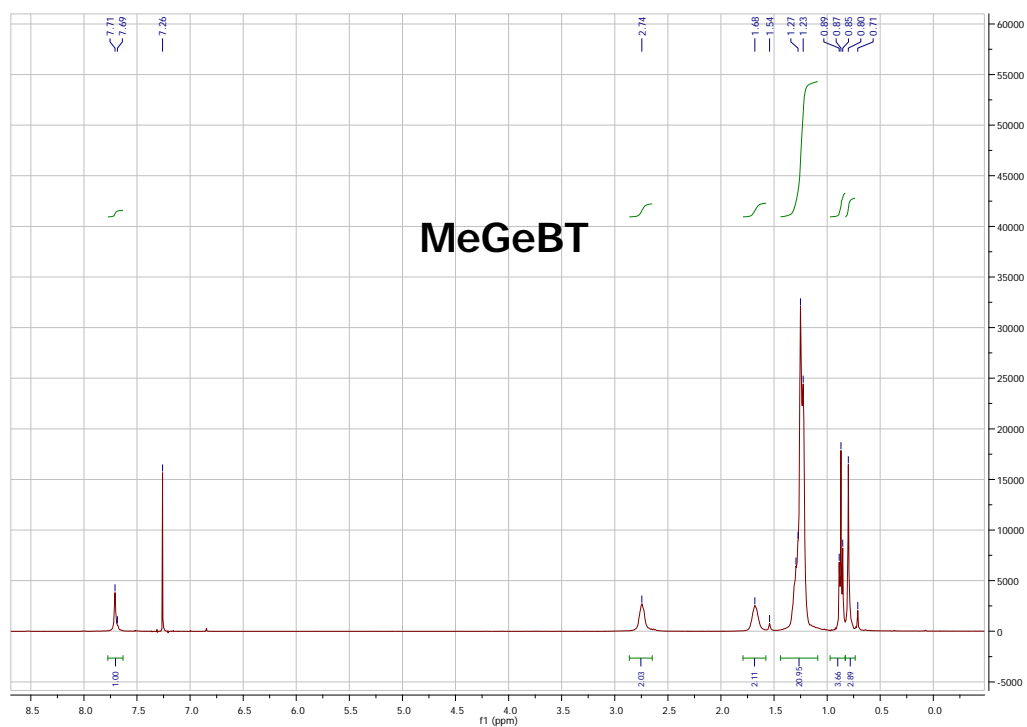

**Figure S9.**  $^1\text{H}$  NMR spectrum of MeSiBT in  $\text{CDCl}_3$ .

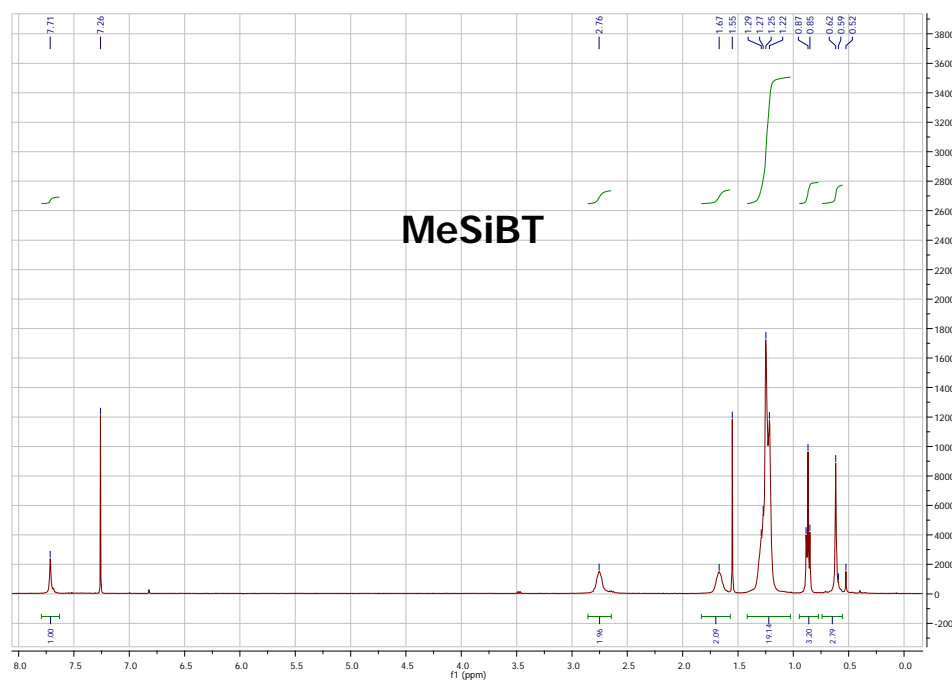

Supplement: c2jm30256j.pdf [file c2jm30256j.pdf]
